# Supplementary material
Source: PubMed Central journal article supplement (PMC4157056)

### oar1

Robust RH map

Oar3.1

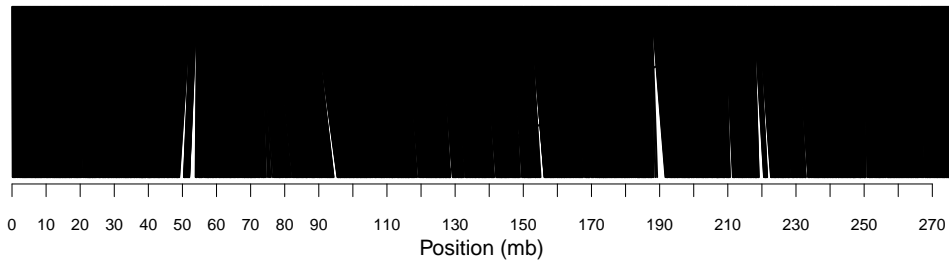

### oar2

Robust RH map

Oar3.1

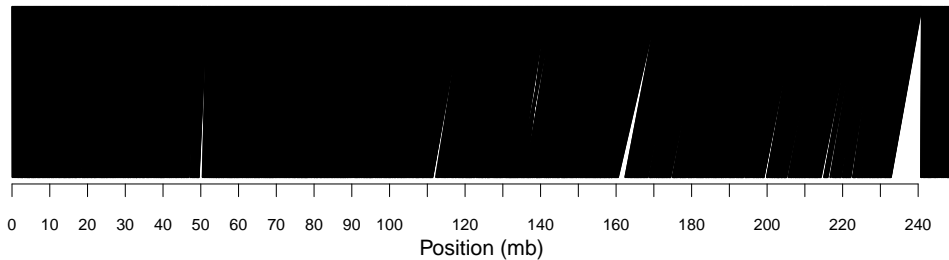

### oar3

Robust RH map

Oar3.1

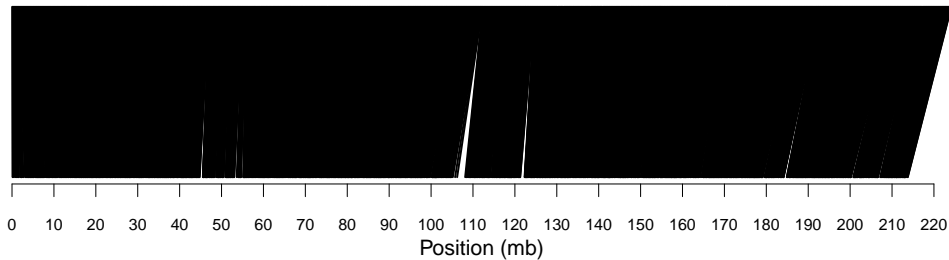

### oar4

Robust RH map

Oar3.1

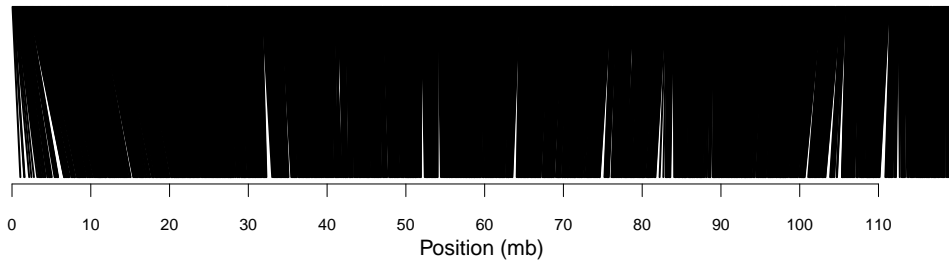

### oar5

Robust RH map

Oar3.1

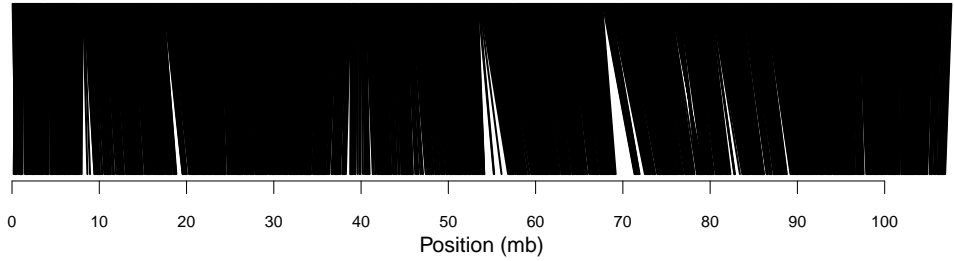

### oar6

Robust RH map

Oar3.1

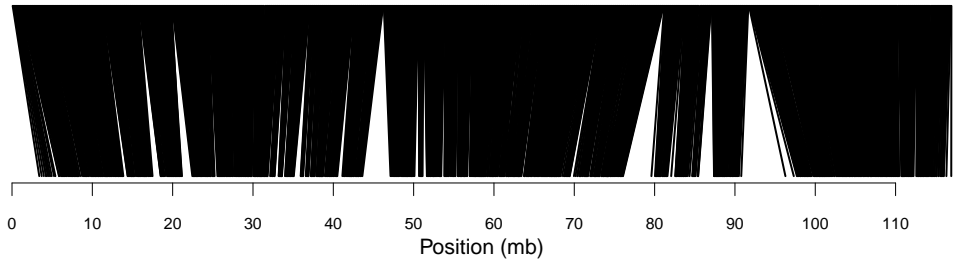

### oar7

Robust RH map

Oar3.1

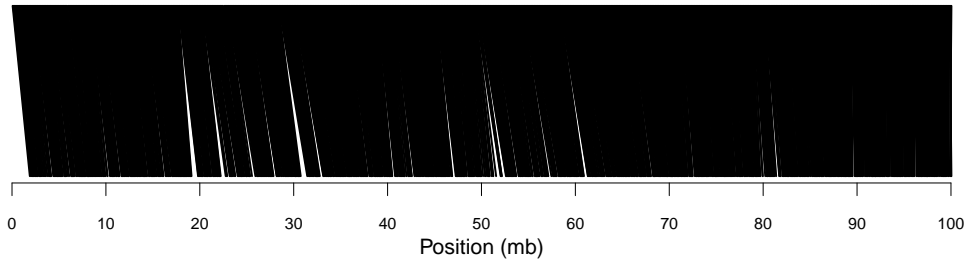

### oar8

Robust RH map

Oar3.1

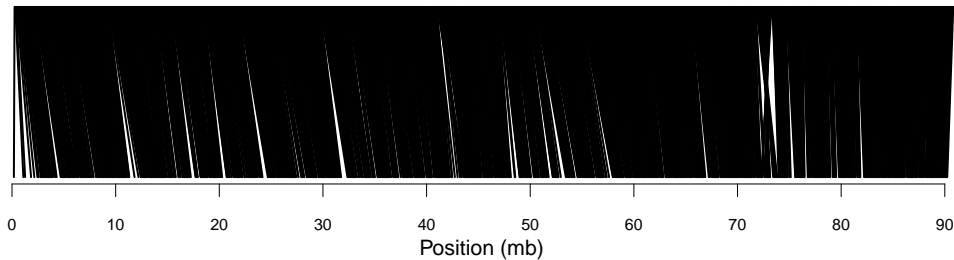

### oar9

Robust RH map

Oar3.1

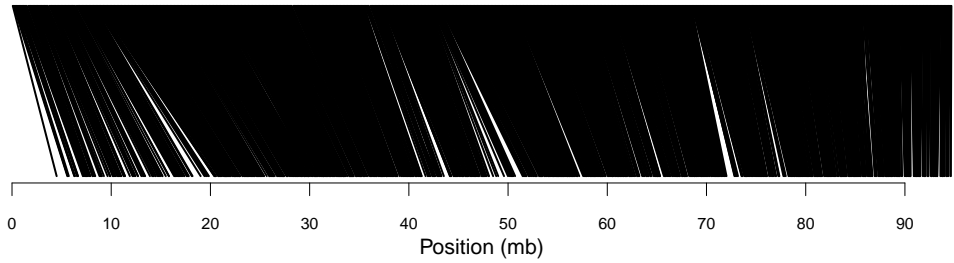

### oar10

Robust RH map

Oar3.1

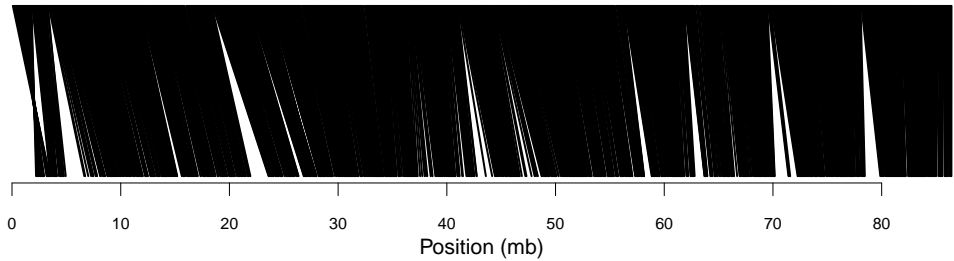

### oar11

Robust RH map

Oar3.1

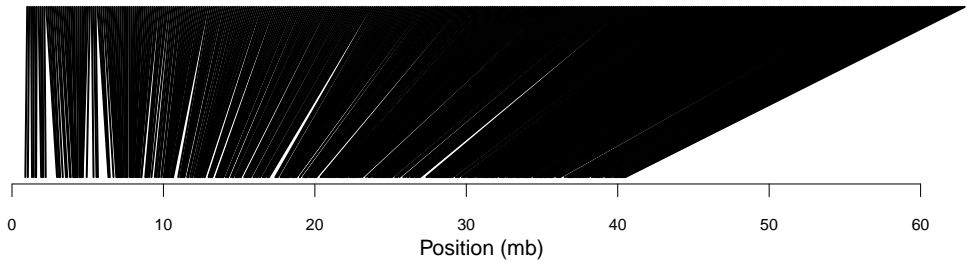

### oar12

Robust RH map

Oar3.1

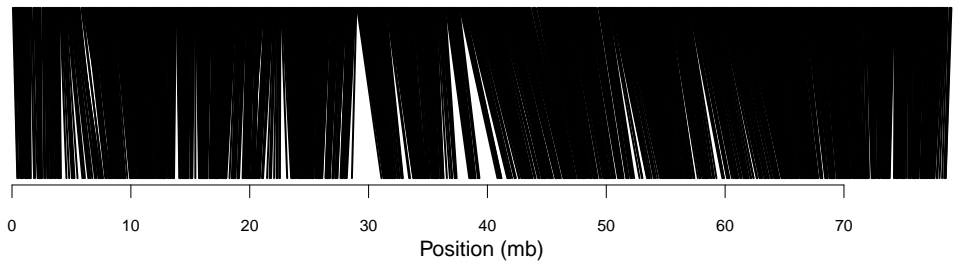

### oar13

Robust RH map

Oar3.1

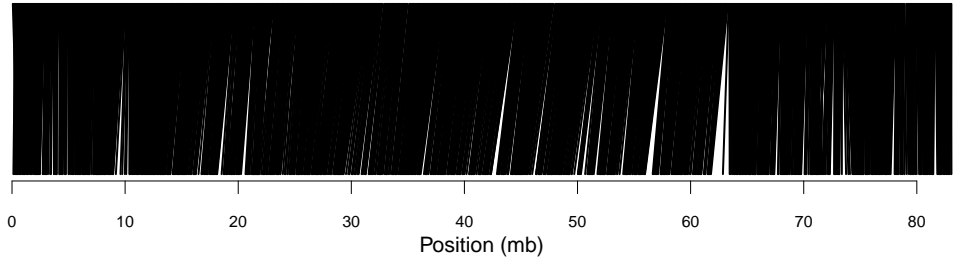

### oar14

Robust RH map

Oar3.1

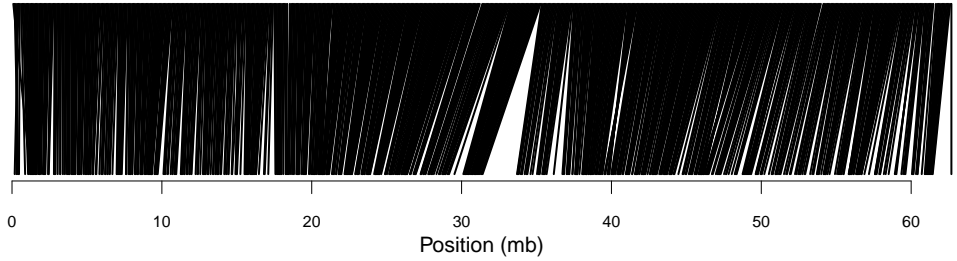

### oar15

Robust RH map

Oar3.1

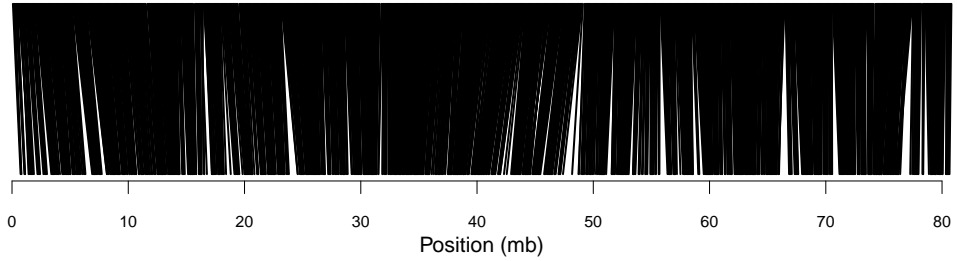

### oar16

Robust RH map

Oar3.1

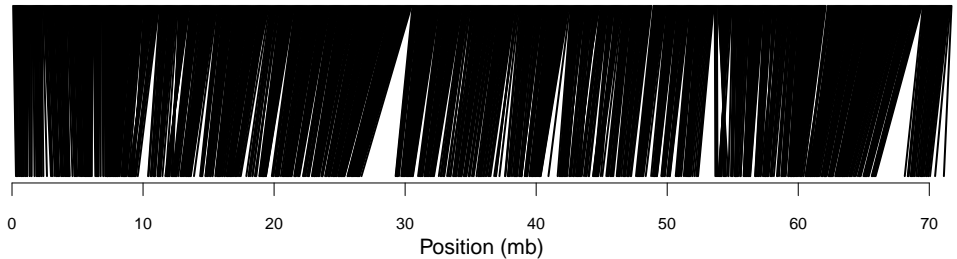

### oar17

Robust RH map

Oar3.1

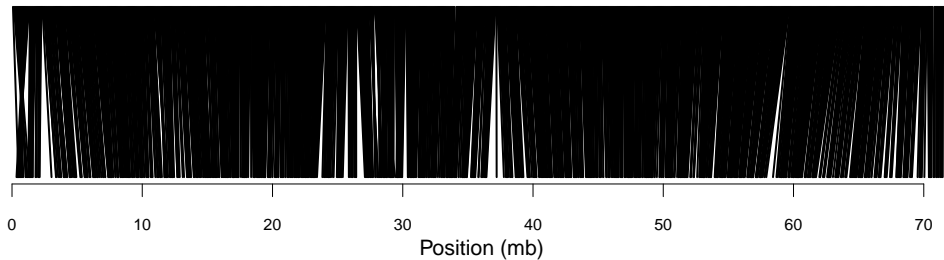

### oar18

Robust RH map

Oar3.1

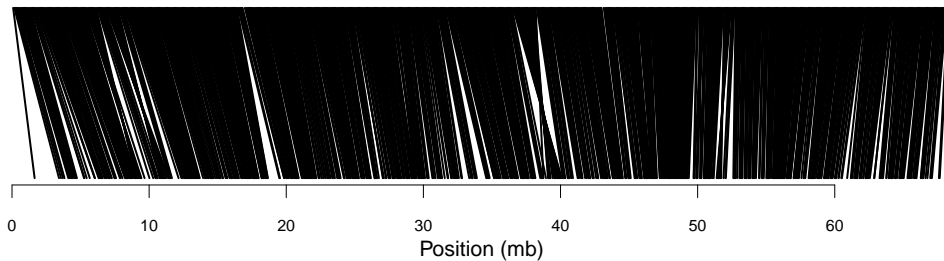

### oar19

Robust RH map

Oar3.1

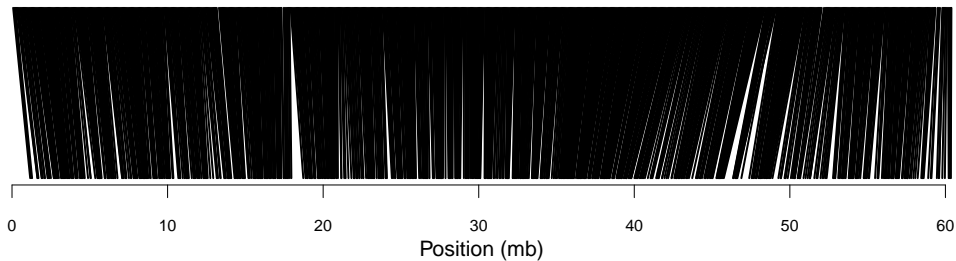

### oar20

Robust RH map

Oar3.1

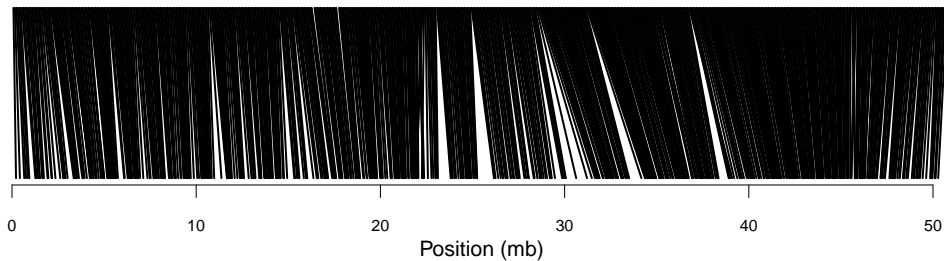

### oar21

Robust RH map

Oar3.1

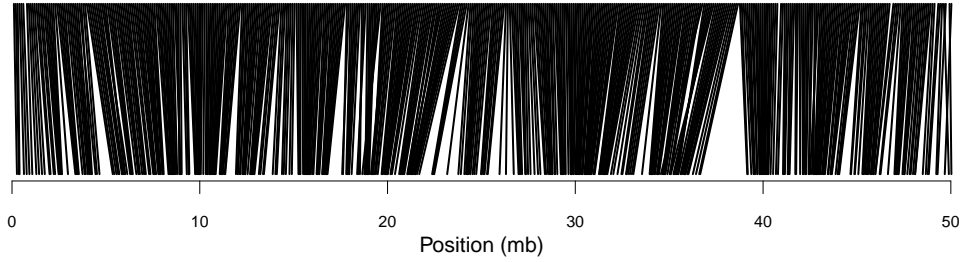

### oar22

Robust RH map

Oar3.1

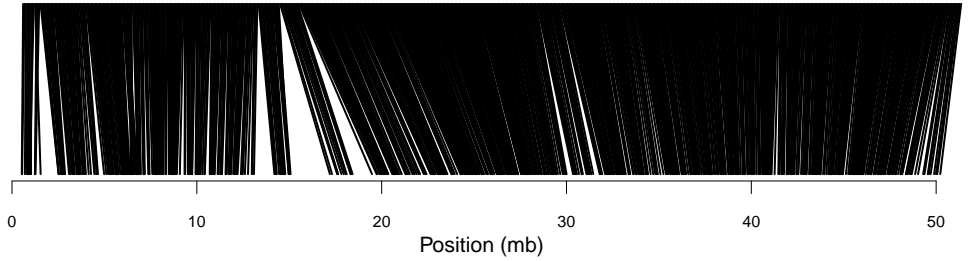

### oar23

Robust RH map

Oar3.1

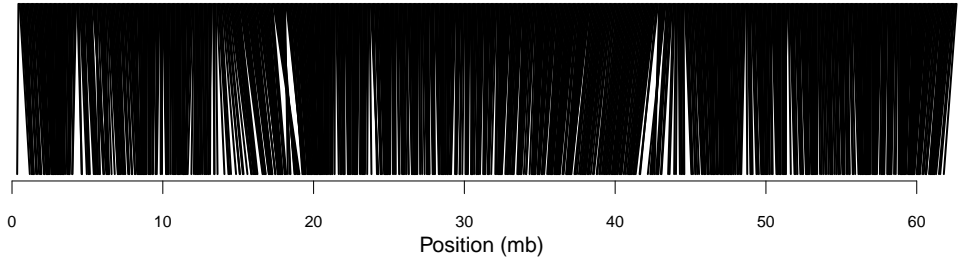

### oar24

Robust RH map

Oar3.1

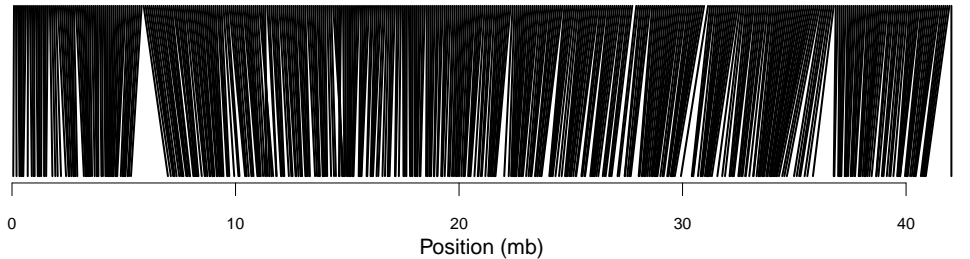

### oar25

Robust RH map

Oar3.1

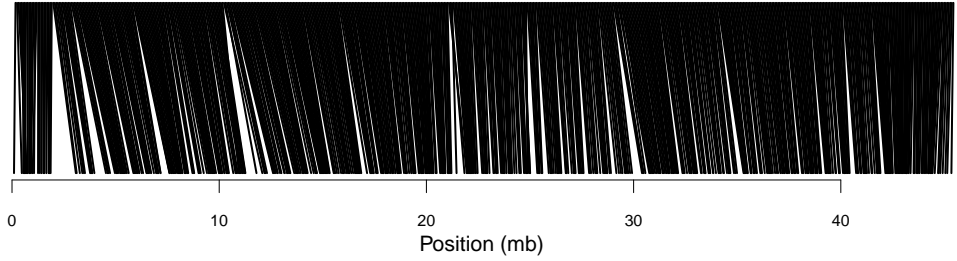

### oar26

Robust RH map

Oar3.1

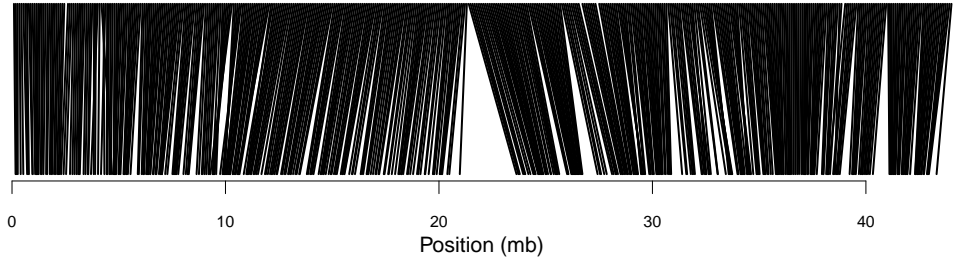

### oarX

Robust RH map

Oar3.1

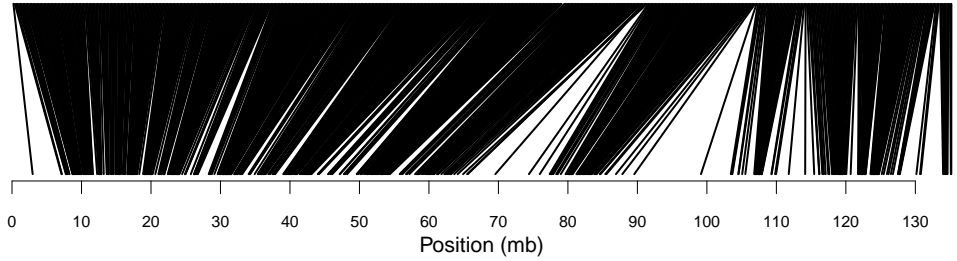

Supplement: NIHMS59983-supplement-Figure_S11.pdf [file NIHMS59983-supplement-Figure_S11.pdf]
