# Supplementary material
Source: PubMed Central journal article supplement (PMC4157056)
Supplement: NIHMS59983-supplement-01.pdf [file NIHMS59983-supplement-01.pdf]

## References and Notes:

1. R. R. Hofmann, *Oecologia* **78**, 443-457 (1989).
243. M. C. Matisse, M. Perlin, A. Chakravarti, *Nat. Genet.* **6**, 384-390 (1994).
344. T. J. Green, *Cytogenet. Cell Genet.* **59**, 122-124 (1992).
445. C. A. V. Zimin et al., *Genome Biol.* **10**, R100 (2009).
546. E. R. J. Edwards et al., *Nat. Commun.* **4**, 1858 (2013).
647. E. G. N. Bergman, *Physiol. Genomics* **10**, 571 (2009).
748. K. R. A. S. Johnson, PhD, The Pennsylvania State University, University Park (2007).
849. D. M. Bickhart et al., *Genome Res.* **22**, 778-790 (2012).
50. E. T. Wang et al., *Nature* **456**, 470-476 (2008).
951. D. Kim et al., *Genome Biol.* **14**, R36 (2013).
192. Materials and methods are available as supplementary material on Science Online.
153. A. Ghobadi et al., *Bioinformatics* **25**, 2872-2877 (2009).
134. M. Karriou, M. H. Cher, D. Hohl, *Exp. Dermatol.* **21**, 643-649 (2012).
135. L. S. Wang et al., *Genomics* **55**, 28-32 (1999).
146. H. G. Spier et al., *Bioinformatics* **23**, 1061-1067 (2007).
157. J. D. White et al., *Anim. Prod. Sci.* **52**, 157-171 (2012).
168. P. N. S. Chinn, *Curr. Protoc. Bioinformatics* **Chapter 4**, Unit 4.10 (2004).
17. K. Feingold, *J. Lipid Res.* **48**, 2531-2546 (2007).
18. D. Marshall, M. Hardman, K. Nield, C. Byrne, *Proc. Natl. Acad. Sci. U.S.A.* **98**, 13031-13036 (2001).
19. F. Radner, S. Grond, G. Haemmerle, A. Laser, R. Zechner, *Dermatoendocrinol.* **3**, 77-83 (2011).
20. D. Cheng et al., *J. Biol. Chem.* **278**, 13611-13614 (2003).
21. A. M. Hall et al., *J. Lipid Res.* **53**, 990-999 (2012).
22. A. Kazantseva et al., *Science* **314**, 982-985 (2006).
23. A. Inoue et al., *EMBO J.* **30**, 4248-4260 (2011).
24. G. Bobe, J. Young, D. Beitz, *J. Dairy Sci.* **87**, 3105-3124 (2004).
25. D. Ingle, D. Bauman, U. Garrigus, *J. Nutr.* **102**, 617-623 (1972).
26. A. M. Crawford et al., *Genetics* **140**, 703-724 (1995).
27. B. P. Dalrymple et al., *Genome Biol.* **8**, R152 (2007).
28. Y. Dong et al., *Nat. Biotechnol.* **31**, 135-141 (2013).
29. R. Geng, C. Yuan, Y. Chen, *PLoS One* **8**, e62704 (2013).
30. R. Scholey et al., *Vet. J.* **197**, 699-706 (2013).
31. D. Takai, P. A. Jones, *Proc. Natl. Acad. Sci. U. S. A.* **99**, 3740-3745 (2002).
32. R. Q. Li et al., *Bioinformatics* **25**, 1966-1967 (2009).
33. R. Li et al., *Nature* **463**, 311-317 (2010).
34. P. Laurent et al., *Anim. Genet.* **38**, 358-363 (2007).
35. C. H. Wu et al., *Anim. Genet.* **40**, 435-455 (2009).
36. J. D. Storey, R. Tibshirani, *Proc. Natl. Acad. Sci. U. S. A.* **100**, 9440-9445 (2003).
37. T. Faraut et al., *Bioinformatics* **23**, E50-E56 (2007).
38. S. de Givry, M. Bouchez, P. Chabrier, D. Milan, T. Schiex, *Bioinformatics* **21**, 1703-1704 (2005).
39. B. Servin, T. Faraut, N. Iannuccelli, D. Zelenika, D. Milan, *BMC Genomics* **13**, 585 (2012).
40. B. Servin, S. de Givry, T. Faraut, *Bioinformatics* **26**, 3035-3042 (2010).
41. J. D. White et al., *Anim. Prod. Sci.* **52**, 157-171 (2012).
42. J. E. Miller, S. C. Bishop, N. E. Cockett, R. A. McGraw, *Vet. Parasitol.* **140**, 83-89 (2006).
43. T. C. Matisse, M. Perlin, A. Chakravarti, *Nat. Genet.* **6**, 384-390 (1994).
44. P. Green, *Cytogenet. Cell Genet.* **59**, 122-124 (1992).
45. A. V. Zimin et al., *Genome Biol.* **10**, (2009).
46. R. L. Ge et al., *Nat. Commun.* **4**, 1858 (2013).
47. G. E. Liu et al., *BMC Genomics* **10**, 571 (2009).
48. R. S. Harris, PhD, The Pennsylvania State University, University Park (2007).
49. D. M. Bickhart et al., *Genome Res.* **22**, 778-790 (2012).
50. E. T. Wang et al., *Nature* **456**, 470-476 (2008).
51. D. Kim et al., *Genome Biol.* **14**, R36 (2013).
52. C. Trapnell et al., *Nat. Biotechnol.* **28**, 511-515 (2010).
53. I. Birol et al., *Bioinformatics* **25**, 2872-2877 (2009).
54. J. Gao et al., *BMC Genomics* **11**, 466 (2010).
55. S. Kurtz et al., *Genome Biol.* **5**, R12 (2004).
56. G. Parra, K. Bradnam, I. Korf, *Bioinformatics* **23**, 1061-1067 (2007).
57. T. Wicker et al., *Nat. Rev. Genet.* **10**, 973-982 (2007).
58. N. Chen, *Curr. Protoc. Bioinformatics* **Chapter 4**, Unit 4.10 (2004).

59. V. Curwen *et al.*, *Genome Res.* **14**, 942-950 (2004).
60. R. Apweiler *et al.*, *Nucleic Acids Res.* **41**, D43-D47 (2013).
61. A. Morgulis, E. M. Gertz, A. A. Schaffer, R. Agarwala, *J. Comp. Biol.* **13**, 1028-1040 (2006).
62. G. Benson, *Nucleic Acids Res.* **27**, 573-580 (1999).
63. E. Birney, R. Durbin, *Genome Res.* **10**, 547-548 (2000).
64. J. E. Collins, S. White, S. M. J. Searle, D. L. Stemple, *Genome Res.* **22**, 2067-2078 (2012).
65. H. Li, R. Durbin, *Bioinformatics* **25**, 1754-1760 (2009).
66. G. S. Slater, E. Birney, *BMC Bioinformatics* **6**, 31 (2005).
67. S. F. Altschul, W. Gish, W. Miller, E. W. Myers, D. J. Lipman, *J. Mol. Biol.* **215**, 403-410 (1990).
68. S. W. Burge *et al.*, *Nucleic Acids Res.* **41**, D226-D232 (2013).
69. A. Kozomara, S. Griffiths-Jones, *Nucleic Acids Res.* **39**, D152-D157 (2011).
70. X. J. Yu, H. K. Zheng, J. Wang, W. Wang, B. Su, *Genomics* **88**, 745-751 (2006).
71. J. Ruan *et al.*, *Nucleic Acids Res.* **36**, D735-D740 (2008).
72. R. C. Edgar, *Nucleic Acids Res.* **32**, 1792-1797 (2004).
73. J. P. Huelsenbeck, F. Ronquist, *Bioinformatics* **17**, 754-755 (2001).
74. Z. H. Yang, *Comput. Appl. Biosci.* **13**, 555-556 (1997).
75. M. J. Benton, P. C. J. Donoghue, *Mol. Biol. Evol.* **24**, 26-53 (2007).
76. T. De Bie, N. Cristianini, J. P. Demuth, M. W. Hahn, *Bioinformatics* **22**, 1269-1271 (2006).
77. A. M. Szalkowski, *BMC Bioinformatics* **13**, (2012).
78. X. Q. Huang, A. Madan, *Genome Res.* **9**, 868-877 (1999).
79. D. L. Adelson, G. R. Cam, U. DeSilva, I. R. Franklin, *Genomics* **83**, 95-105 (2004).
80. Y. Benjamini, T. P. Speed, *Nucleic Acids Res.* **40**, (2012).
81. M. Nothnagel *et al.*, *Hum. Mutat.* **32**, 98-106 (2011).
82. R. She, J. S. Chu, K. Wang, J. Pei, N. Chen, *Genome Res.* **19**, 143-149 (2009).
83. E. L. Sonnhammer, G. von Heijne, A. Krogh, *Proc. Int. Conf. Intell. Syst. Mol. Biol.* **6**, 175-182 (1998).
84. A. L. Archibald *et al.*, *Anim. Genet.* **41**, 449-453 (2010).
85. X. Xu *et al.*, *GigaScience*. 2012 (<http://dx.doi.org/10.5524/100023>).
86. S. L. Salzberg *et al.*, *Genome Res.* **22**, 557-567 (2012).
87. J. W. Kijas *et al.*, *PLoS Biol.* **10**, e1001258 (2012).
88. Q. Qiu *et al.*, *Nat. Genet.* **44**, 946-949 (2012).
89. C. G. Elsik *et al.*, *Science* **324**, 522-528 (2009).
90. E. Gootwine, *Anim. Reprod. Sci.* **82-83**, 551-566 (2004).
91. C. M. Wade *et al.*, *Science* **326**, 865-867 (2009).
92. J. M. Kidd *et al.*, *Am. J. Hum. Genet.* **91**, 660-671 (2012).
93. M. A. Groenen *et al.*, *Nature* **491**, 393-398 (2012).
94. R. N. Kim *et al.*, *DNA Res.* **19**, 275-287 (2012).
95. J. W. Kijas *et al.*, *PLoS One* **4**, e4668 (2009).
96. L. Iannuzzi, G. P. Dimeo, *Chromosome Res.* **3**, 291-299 (1995).
97. J. F. Maddox, *Genet. Sel. Evol.* **37**, 1-10 (2005).
98. T. Goldammer *et al.*, *Chromosome Res.* **17**, 497-506 (2009).
99. A. S. Van Laere, W. Coppieters, M. Georges, *Genome Res.* **18**, 1884-1895 (2008).
100. R. L. Jirtle, J. R. Weidman, *Am. Sci.* **95**, 143-149 (2007).
101. I. M. Morison, J. P. Ramsay, H. G. Spencer, *Trends Genet.* **21**, 457-465 (2005).
102. N. E. Cockett *et al.*, *Genet. Sel. Evol.* **37**, S65-S81 (2005).
103. E. A. Glazov, S. McWilliam, W. C. Barris, B. P. Dalrymple, *Mol. Biol. Evol.* **25**, 939-948 (2008).
104. T. M. Jermann, J. G. Opitz, J. Stackhouse, S. A. Benner, *Nature* **374**, 57-59 (1995).
105. D. E. Dobson, E. M. Prager, A. C. Wilson, *J. Biol. Chem.* **259**, 11607-11616 (1984).
106. H. R. Ibrahim, U. Thomas, A. Pellegrini, *J. Biol. Chem.* **276**, 43767-43774 (2001).
107. B. J. Norris, V. A. Whan, *Genome Res.* **18**, 1282-1293 (2008).
108. B. P. Telugu, A. M. Walker, J. A. Green, *BMC Genomics* **10**, 185 (2009).
109. J. A. Green *et al.*, *Biol. Reprod.* **62**, 1624-1631 (2000).
110. K. Koshi, K. Ushizawa, K. Kizaki, T. Takahashi, K. Hashizume, *Placenta* **32**, 493-499 (2011).
111. R. Oko, C. Morales, *Dev. Biol.* **166**, 235-245 (1994).
112. W. Lagakos *et al.*, *J. Biol. Chem.* **288**, 19805-19815 (2013).
